# Supplementary material for: Gait switches in deep-diving beaked whales: biomechanical strategies for long-duration dives
Source: Oxford University Press journal article supplement (doi:10.1242/jeb.106013), 2015-05-01
Supplement: jeb106013supp.pdf [file jeb106013supp.pdf]

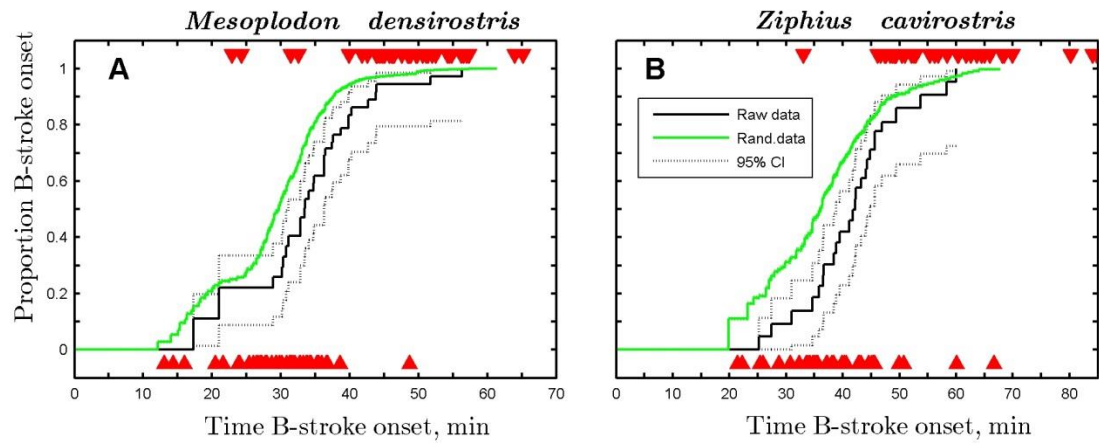

**Fig. S1. Survival plots for type-B stroke onset time from the start of each deep dive of Md (A) and Zc (B) including interval-censored data.** Plots for the observed data and corresponding 95% confidence intervals (dashed lines) are coloured in black while the result from 1000 randomized samples is shown in green. Start and end times of the ascent phase within each deep dive are shown by red upright-triangles and inverted-triangles respectively.
